# Supplementary material for: Integrated analyses of translatome and proteome identify the rules of translation selectivity in RPS14-deficient cells
Source: PubMed Central journal article supplement — Haematologica. 2020 Apr 23;106(3):746–58. doi: 10.3324/haematol.2019.239970 (PMC7927886; doi:10.3324/haematol.2019.239970), 2020-04-23
Supplement: 2019_239970-Disclosures_Contributions.pdf [file 2019_239970-Disclosures_Contributions.pdf]

Haematologica  
HAEMATOL/2019/239970  
Version 3

Integrated analyses of translato~~m~~e and proteome identify the rules of translation selectivity in RPS14-deficient cells

Ismael Boussaid, Salomé Le Goff, Célia Floquet, Emilie-Fleur Gautier, Anna Raimbault, Pierre-Julien Viailly, Dina Al Dulaimi, Barbara Burroni, Isabelle Dusanter-Fourt, Isabelle Hatin, Patrick Mayeux, Bertrand Cosson, and Michaela Fontenay

Disclosures: None

Contributions: IB designed the study, performed the experiments, analyzed the data and wrote the manuscript; SLG, CF, DAD, AR, E-FG, P-JV, BB performed the experiments and analyzed the data; IH, ID-F, PM analyzed the data and reviewed the manuscript; BC: designed the study and analyzed the data; MF designed the study, analyzed the data, supervised the work and wrote the manuscript.
